# Supplementary material
Source: HighWire-hosted journal article supplement (https://gut.bmj.com/content/70/2/309)
Supplement: inline-supplementary-material-3 [file inline-supplementary-material-3.pdf]

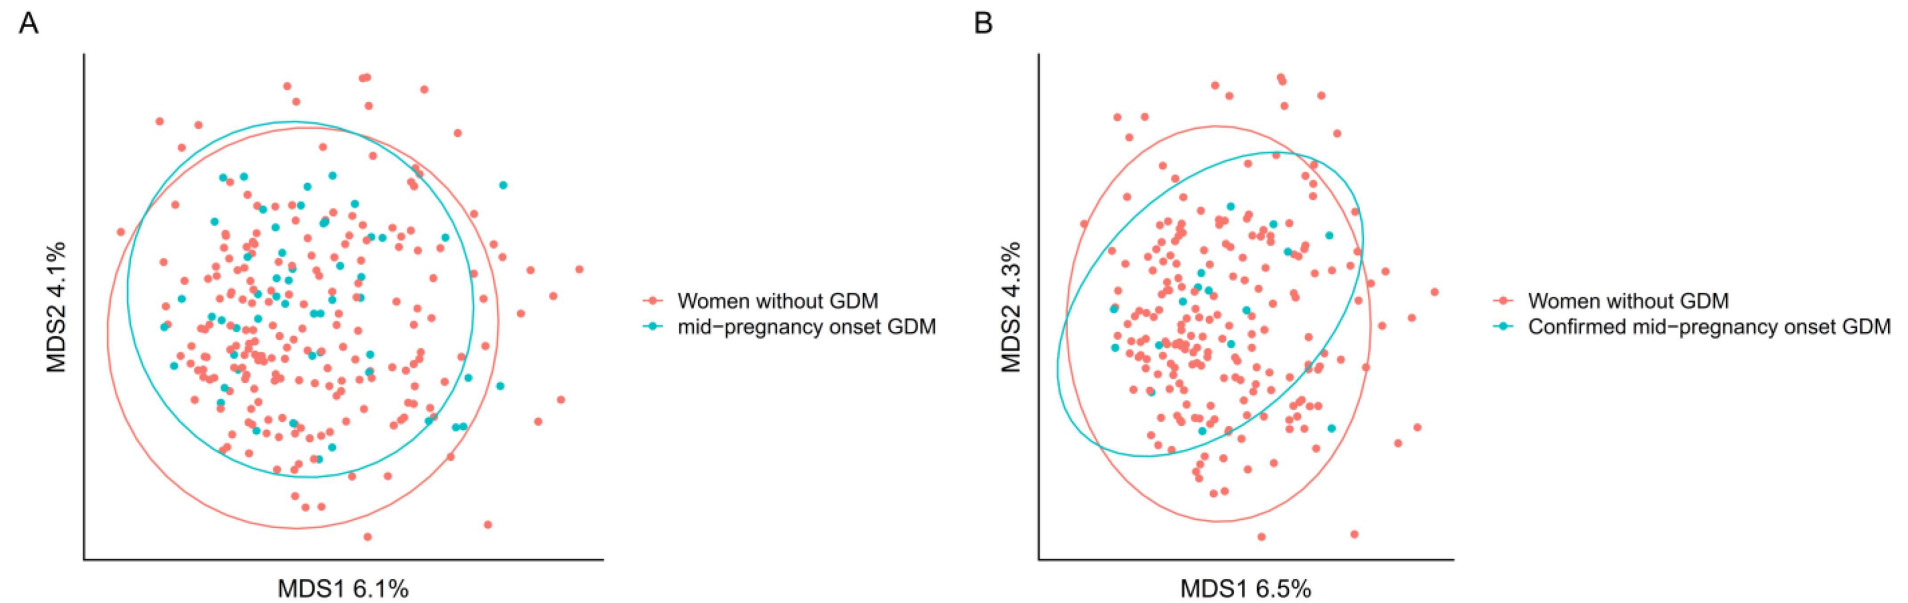

Figure S1. A Principal Coordinates Analysis (PCoA) of the gut microbiota at early pregnancy between women remaining without GDM (n=203) and women with mid-pregnancy onset GDM (A, n=53) or with confirmed mid-pregnancy onset GDM (B, n=16).

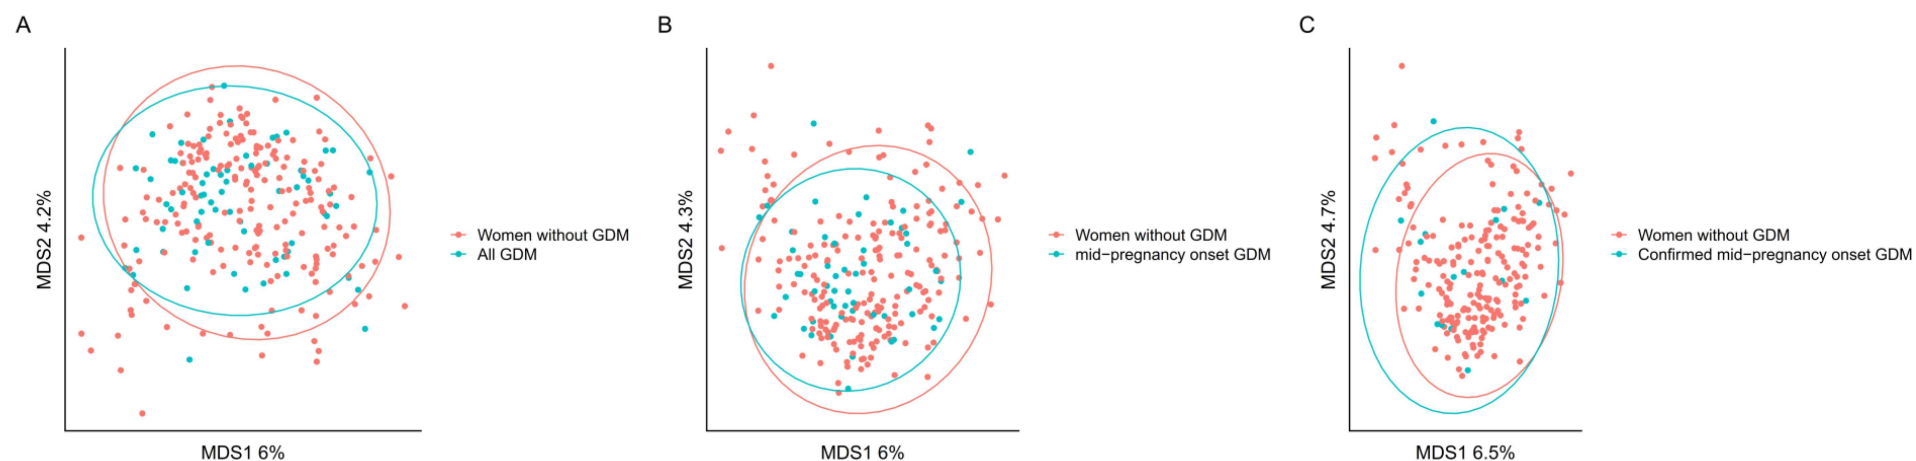

Figure S2. A Principal Coordinates Analysis (PCoA) (A, B, C) of the gut microbiota at late pregnancy between women without GDM (n=203) and women with GDM diagnosed early and late pregnancy (All GDM, n=67) (A) or with mid-pregnancy onset GDM (B, n=53) or with confirmed mid-pregnancy onset GDM (C, n=16).

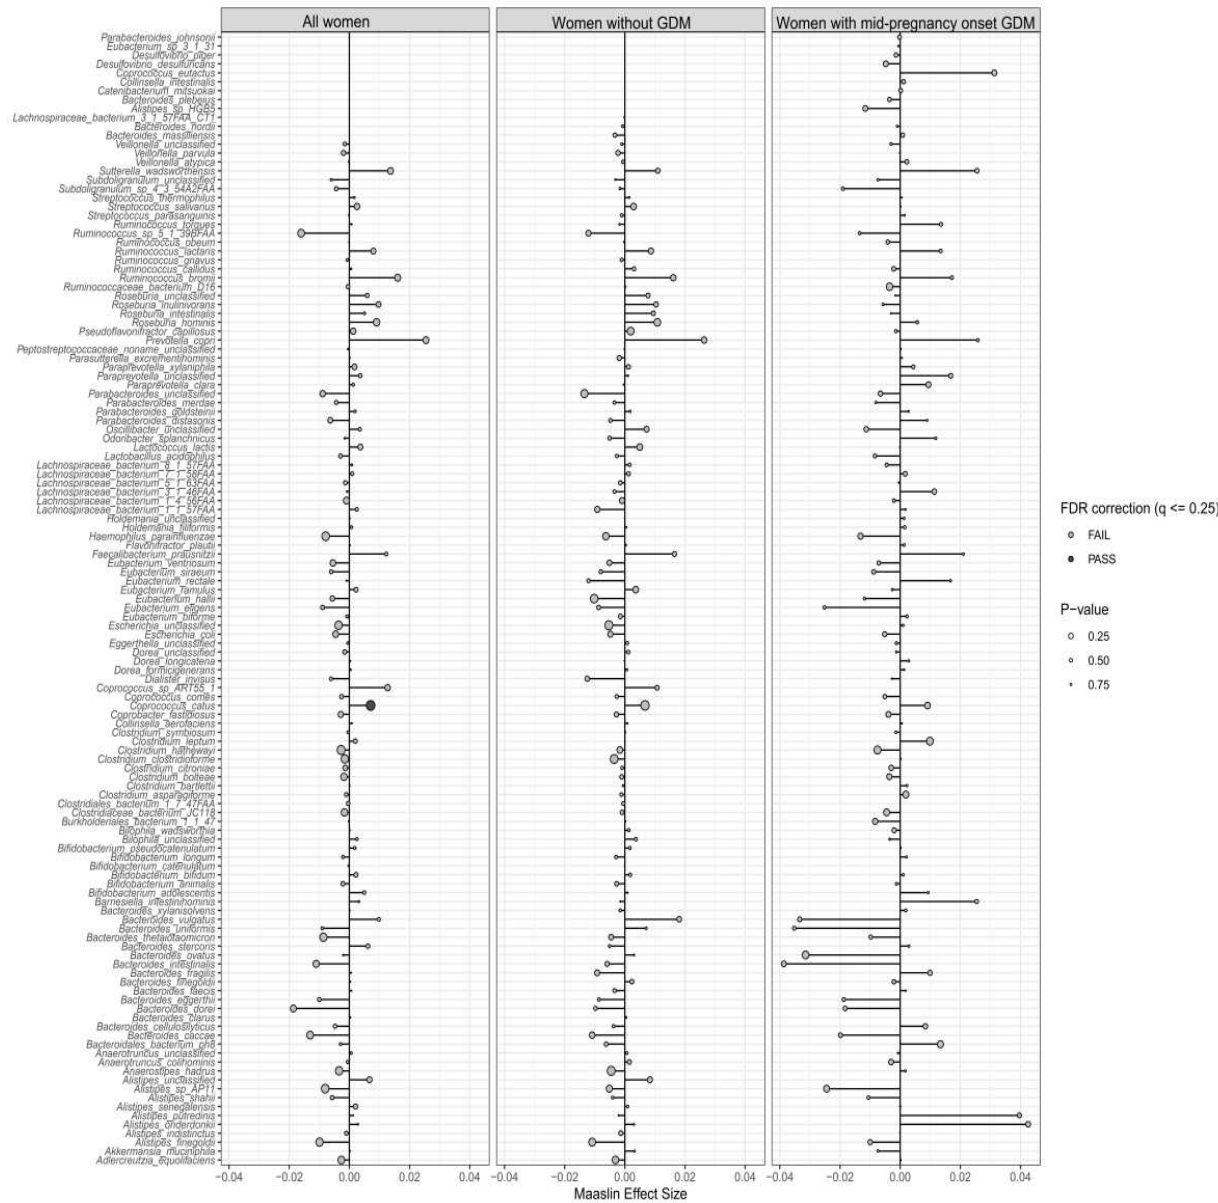

Figure S3a. Changes from early to late pregnancy in bacterial species in placebo group with all women, women without GDM and women with mid-pregnancy onset GDM. All women, n=61, women without GDM, n=49, women with mid-pregnancy onset GDM, n=14.

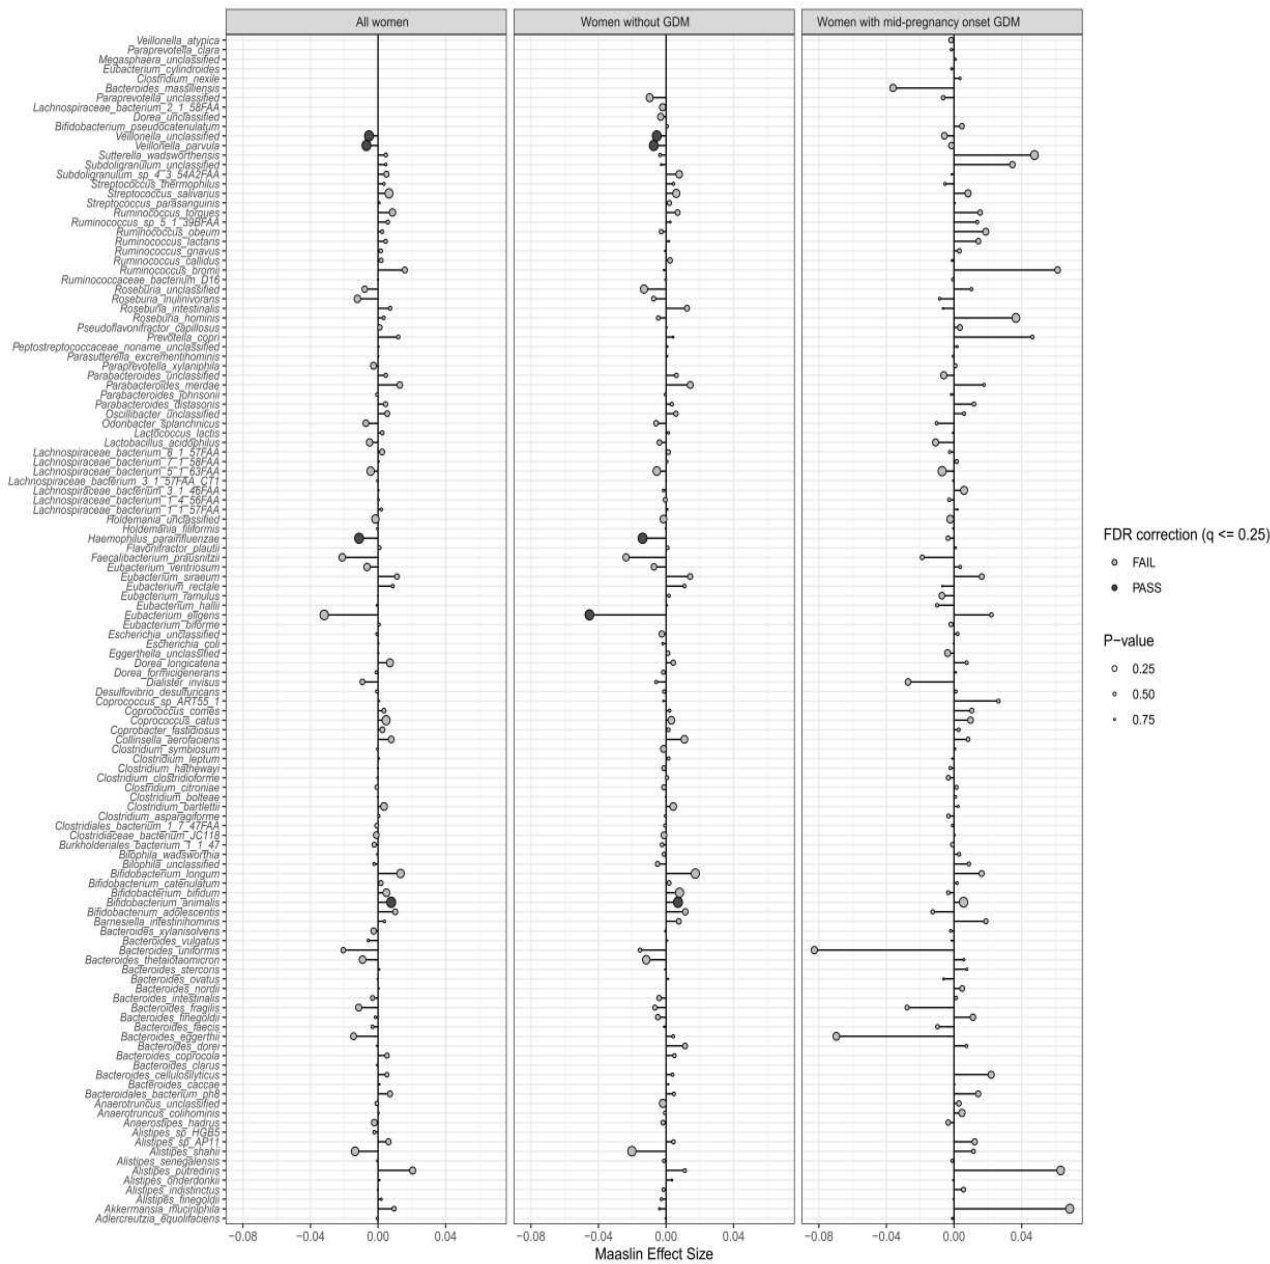

Figure S3b. Changes from early to late pregnancy in bacterial species in fish oil+probiotics group with all women, women without GDM and women with mid-pregnancy onset GDM. All women, n=69, women without GDM, n=53, women with mid-pregnancy onset GDM, n=13.

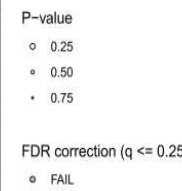

Mokkala K, *et al.* Gut 2021; 70:309–318. doi: 10.1136/gutjnl-2020-321643



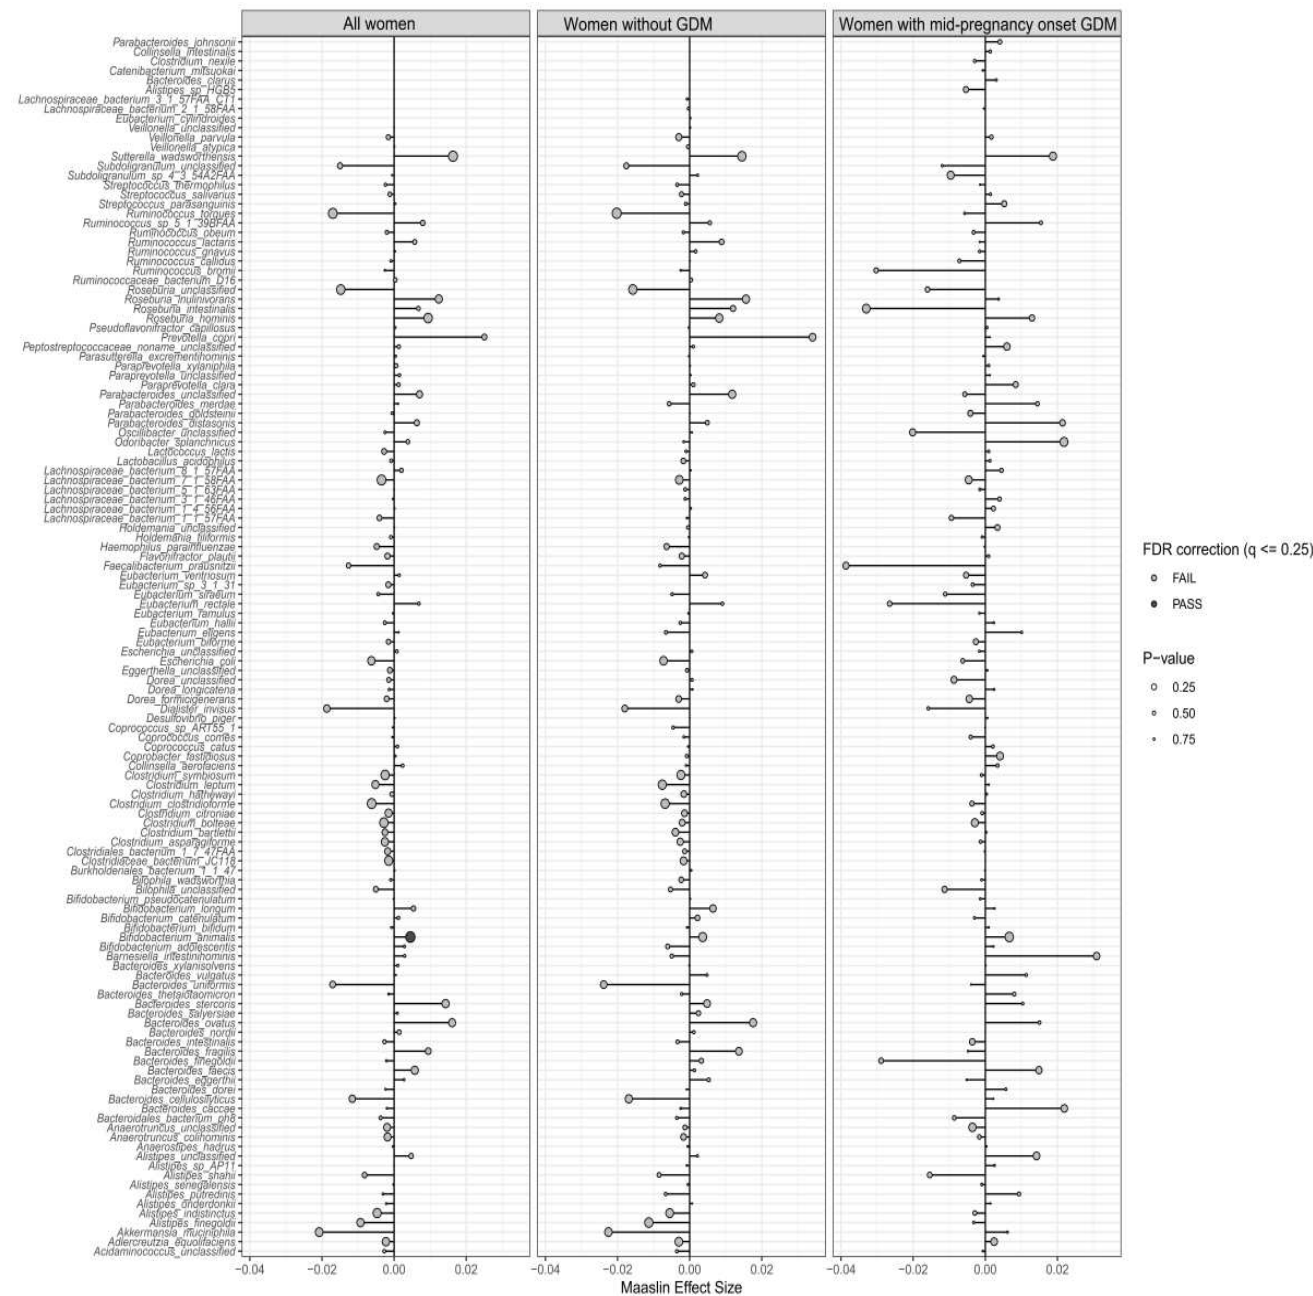

Figure S3d. Changes from early to late pregnancy in bacterial species in probiotics group with all women, women without GDM and women with mid-pregnancy onset GDM. All women, n=72, women without GDM, n=52, women with mid-pregnancy onset GDM, n=16.

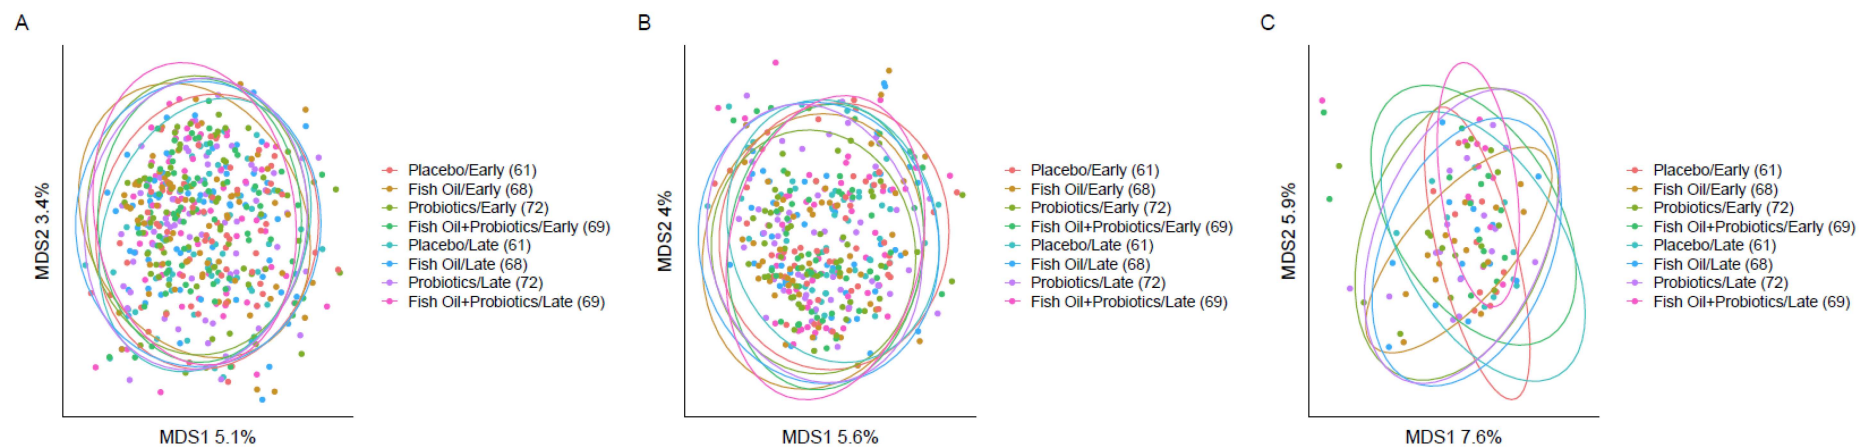

Figure S4. A Principal Coordinates Analysis (PCoA) (A, B, C) of the gut microbiota at early and late pregnancy. (A) all women in intervention groups included, (B) women without GDM included, (C) women with mid-pregnancy onset GDM.
